# Supplementary material for: Single-cell transcriptome landscape of ovarian cells during primordial follicle assembly in mice
Source: PLoS Biol. 2020 Dec 22;18(12):e3001025. doi: 10.1371/journal.pbio.3001025 (PMC7787681; doi:10.1371/journal.pbio.3001025)
Supplement: S5 Table — KEGG, Kyoto Encyclopedia of Genes and Genomes. (XLSX) [file pbio.3001025.s012.xlsx]

## Sheet: S5_Table
Supplemental Table 5: KEGG pathway of gene set 1 and 2 with high expression in germ cell in follicle
ID	Description	GeneRatio	BgRatio	pvalue	p.adjust	qvalue	geneID	Count
mmu05012	Parkinson disease	103/1106	248/8870	1.52e-31	4.78e-29	3.96e-29	22223/67128/19184/66997/19181/56436/22433/69077/17463/18749/227197/26414/14683/22152/22146/26441/66142/12028/26446/19179/26444/12868/22143/19166/12313/67089/67530/26445/227613/73677/22187/19167/21762/73710/19177/11946/19185/22123/19182/21823/57320/22213/22190/26443/66445/68342/23996/19173/69875/22273/68202/73333/84682/12314/59029/18747/17992/66945/11947/78330/11949/22272/26440/22059/22334/17995/6…	103
mmu05016	Huntington disease	107/1106	304/8870	1.54e-25	2.42e-23	2.01e-23	19184/19712/66997/19181/56436/69077/17463/73916/20021/21780/227197/26414/68118/22152/641340/22146/26441/66142/12028/15182/26446/19179/26444/12868/22143/66420/19166/67089/67710/67530/26445/227613/73677/12757/19167/232910/21762/73710/19177/53598/11946/19185/22123/19182/66491/26443/66445/68342/20656/23996/19173/69875/22273/74325/68202/73333/84682/11773/69241/11771/59029/245841/17992/66945/11947/7833…	107
mmu05020	Prion disease	92/1106	268/8870	3.5e-21	3.2e-19	2.65e-19	19184/66997/19181/56436/69077/17463/12995/12915/18749/227197/26414/22152/22146/26441/66142/12028/26446/19179/26444/12868/22143/19166/67089/67530/26445/227613/73677/19167/21762/73710/19177/11946/19185/22123/19182/26443/66445/68342/23996/19173/69875/19058/22273/68202/73333/84682/59029/18747/17992/66945/11947/78330/11949/22272/26440/22334/17995/67264/23997/22333/66091/110382/228033/68349/66413/70316…	92
mmu05014	Amyotrophic lateral sclerosis	113/1106	370/8870	4.07e-21	3.2e-19	2.65e-19	11750/83454/19184/18645/66997/19181/56436/22433/69736/68942/69077/17463/269113/227197/68118/237082/22152/641340/22146/26441/66142/15382/12028/26446/229279/18643/19179/26444/11465/11461/12868/22143/19166/67089/67530/26445/227613/73677/19167/21762/73710/19177/53598/11946/20383/19185/22123/19182/26443/12460/66445/68342/23996/19173/69875/19058/22273/110379/68202/84682/53379/11744/59029/17992/66945/11…	113
mmu03050	Proteasome	33/1106	47/8870	5.63e-20	3.53e-18	2.93e-18	19184/66997/19181/56436/69077/17463/26441/26446/66537/19179/26444/19166/67089/26445/73677/19167/21762/19177/19185/22123/19182/26443/23996/19173/59029/26440/23997/66413/67151/57296/19175/20422/19171	33
mmu05010	Alzheimer disease	101/1106	369/8870	2.45e-15	1.28e-13	1.06e-13	19184/66997/19181/56436/22433/69077/17463/12995/227197/26414/68118/22152/641340/22146/26441/66142/26446/19179/26444/12868/22143/19166/12313/67089/67738/67530/26445/227613/234664/73677/19167/21762/73710/19177/11946/19185/22123/19182/26443/66445/68342/23996/19173/69875/19058/22273/27373/68202/73333/84682/12314/66340/59029/17992/66945/11947/78330/11949/22272/26440/22334/17995/67264/23997/22333/66091…	101
mmu03040	Spliceosome	51/1106	136/8870	5.58e-14	2.5e-12	2.07e-12	66810/23983/319322/107701/56070/20227/11834/71702/75062/15382/229279/108121/67332/51810/15387/20638/66373/68183/17149/20383/20630/192170/27366/66094/68816/60365/68479/27756/53607/56031/67959/66125/20639/66492/53817/67678/66877/66101/66055/53317/68981/67439/231889/13207/212880/20641/76938/15381/57905/66070/60321	51
mmu00190	Oxidative phosphorylation	47/1106	133/8870	6.66e-12	2.61e-10	2.16e-10	114143/66335/227197/66142/12868/11974/67530/66144/11946/66445/68342/69875/11958/22273/68202/84682/17992/66945/11947/78330/11966/11949/22272/73834/11944/17995/67264/66091/228033/68349/70316/12861/11973/66377/68194/225887/66414/66694/17993/110323/78174/11957/76252/68197/230075/333182/407785	47
mmu01200	Carbon metabolism	44/1106	122/8870	1.43e-11	5e-10	4.14e-10	67834/170718/13382/83553/14661/97212/239017/110446/18746/17448/236539/21351/14719/11532/19139/56451/13806/17449/235339/66646/14194/66945/20916/11409/20917/68263/18655/67078/18648/107029/93747/14751/108037/110821/434437/20425/15929/68133/11428/21881/66904/104776/14121/13885	44
mmu03013	RNA transport	52/1106	181/8870	2.91e-09	9.14e-08	7.57e-08	83454/69736/20901/12729/20595/269113/97112/54364/53975/56698/73192/237082/13681/20610/20220/13685/66235/13684/230721/117109/218693/17149/192170/19387/19384/110379/60365/53356/22196/68969/26905/53817/13680/55944/22218/72124/100041953/20918/16341/386612/69912/224045/14359/27374/208366/20430/71805/13667/223921/67724/27979/67053	52
mmu04932	Non-alcoholic fatty liver disease	45/1106	151/8870	9.89e-09	2.72e-07	2.25e-07	21428/22433/26403/72674/227197/26414/66142/12028/12868/12540/67530/66445/68342/69875/22273/68202/84682/17992/66945/78330/22272/17995/67264/66091/68349/70316/12861/66377/13067/68194/225887/66414/66694/17993/110323/78174/13063/68197/105787/230075/108099/19353/333182/407785/18709	45
mmu04714	Thermogenesis	60/1106	230/8870	1.04e-08	2.72e-07	2.25e-07	68493/20588/231430/19744/18749/227197/14683/66142/11465/11461/12868/67530/11946/20587/66445/68342/69875/11958/22273/68202/84682/18747/17992/70127/66945/11947/78330/11949/22272/17995/67264/66091/228033/68349/70316/12861/66377/68194/73694/66272/68033/225887/50721/52469/66414/66694/17993/110323/78174/11957/76947/18176/68197/105787/230075/76178/108099/333182/407785/75597	60
mmu04141	Protein processing in endoplasmic reticulum	47/1106	167/8870	3.43e-08	8.27e-07	6.85e-07	67128/56424/14827/27061/22433/71853/15505/19359/12915/54197/13200/216440/19358/105245/216080/26414/386649/12330/20014/108687/66753/109815/12028/21402/66105/15502/15516/66256/22213/110379/56445/66245/20335/66530/20334/56438/22230/15519/13135/66212/16430/67397/75744/70377/72265/15467/81500	47
mmu03420	Nucleotide excision repair	20/1106	43/8870	3.94e-08	8.83e-07	7.31e-07	72584/209357/66671/19359/19358/26370/19687/19891/18972/69263/22591/56438/19718/14885/18538/106344/68275/22590/66467/72151	20
mmu03020	RNA polymerase	16/1106	31/8870	1.48e-07	3.09e-06	2.56e-06	20021/20016/67065/66420/67710/67005/67486/66491/78929/69241/245841/20018/17749/20022/74414/69833	16
mmu05017	Spinocerebellar ataxia	38/1106	131/8870	3.02e-07	5.93e-06	4.91e-06	19184/66997/19181/56436/22433/69077/17463/67134/26414/68118/641340/69597/26441/26446/19179/26444/19166/67089/26445/73677/19167/21762/19177/19185/22123/19182/26443/23996/19173/59029/26440/23997/66413/67151/57296/19175/20422/18709	38
mmu00620	Pyruvate metabolism	17/1106	39/8870	1.3e-06	2.4e-05	1.99e-05	13382/14651/16832/110446/18746/17448/56752/17449/66204/235339/14194/109801/68263/76238/110695/107029/16833	17
mmu00020	Citrate cycle (TCA cycle)	15/1106	32/8870	1.78e-06	3.11e-05	2.57e-05	67834/170718/13382/239017/17448/56451/17449/235339/14194/66945/20916/20917/68263/15929/11428	15
mmu00280	Valine, leucine and isoleucine degradation	21/1106	57/8870	2.14e-06	3.53e-05	2.93e-05	13382/15356/97212/110446/56752/11364/231086/11409/208715/12035/78038/12039/110695/93747/15108/110821/12040/113868/66904/15107/104776	21
mmu00640	Propanoate metabolism	15/1106	34/8870	4.58e-06	7.2e-05	5.96e-05	13382/97212/16832/110446/56451/20916/11409/20917/12039/93747/110821/12040/16833/66904/104776	15
mmu03008	Ribosome biogenesis in eukaryotes	33/1106	122/8870	9.54e-06	0.000142572	0.000118053	83454/21771/69237/74778/245474/213773/12995/67134/97112/54364/72515/30877/21453/237082/24128/67045/104444/14113/55989/225348/117109/73736/16418/19384/14000/72554/230737/217109/208366/73674/68147/67724/59028	33
mmu00630	Glyoxylate and dicarboxylate metabolism	14/1106	32/8870	1.08e-05	0.00015378	0.000127334	13382/110446/17448/17449/67078/76238/108037/110821/434437/20425/68133/11428/66904/14645	14
mmu04110	Cell cycle	33/1106	123/8870	1.15e-05	0.000157051	0.000130042	22629/12534/12237/268930/26428/21809/66671/381759/69957/15182/21402/13559/22627/22631/30939/268697/56371/22059/12578/56438/12442/17216/22630/18538/54401/56150/50793/18817/59008/19357/52206/22628/56317	33
mmu01230	Biosynthesis of amino acids	24/1106	77/8870	1.2e-05	0.000157051	0.000130042	67834/170718/83553/11720/108645/18746/236539/21351/14719/19139/13806/11898/66646/12035/18655/18648/108037/209027/20425/15929/18416/11428/21881/14645	24
mmu04114	Oocyte meiosis	32/1106	119/8870	1.48e-05	0.000185685	0.000153752	22629/12534/19047/268930/12877/69957/18749/21402/22627/12313/19045/22631/30939/19058/12314/268697/18747/56438/12442/26395/51792/17451/22630/54401/56150/73699/18817/59008/52206/22628/56317/19046	32
mmu03430	Mismatch repair	11/1106	22/8870	2.05e-05	0.000247555	0.000204982	17688/381760/19687/19891/18972/69263/19718/18538/106344/68275/72151	11
mmu04137	Mitophagy - animal	21/1106	66/8870	2.95e-05	0.000342647	0.00028372	66687/56484/52440/12995/26414/84092/14479/22187/22190/12177/22059/72018/11793/93739/12176/66922/19349/18176/233204/22186/56486	21
mmu03018	RNA degradation	24/1106	83/8870	4.79e-05	0.000537239	0.000444848	13209/72068/24128/68533/230721/57316/15510/50911/66373/66317/13806/66094/67207/27756/15526/69639/66583/67678/240023/109075/71701/66446/12226/56057	24
mmu04144	Endocytosis	55/1106	270/8870	0.000130052	0.00140815	0.00116599	93742/67804/20408/12345/68942/73178/13854/13660/54673/11845/84092/74192/11844/72183/76959/67771/12540/68953/56378/98366/12757/232910/30930/68089/12343/67028/74325/11773/73711/216238/19326/22088/11771/28084/76709/53869/27965/64931/66914/216869/65114/66201/70527/11848/27681/69178/234852/72543/216724/19349/11842/28006/22365/17274/69150	55
mmu05100	Bacterial invasion of epithelial cells	21/1106	73/8870	0.000151867	0.00158955	0.00131618	216033/20418/16202/73178/622434/74192/11465/11461/67771/12540/56378/12757/68089/78514/74325/76709/242687/11848/13043/19353/18709	21
mmu00520	Amino sugar and nucleotide sugar metabolism	16/1106	50/8870	0.00023948	0.0024257	0.00200854	67980/216558/266690/26384/14635/245847/12764/218138/15211/15212/14751/331026/54342/22122/14430/94181	16
mmu04120	Ubiquitin mediated proteolysis	33/1106	145/8870	0.000371432	0.00364467	0.00301788	67128/56424/72584/69957/109161/216080/50868/71745/66799/68612/21402/66105/67923/22187/22194/22213/22190/56459/22196/19823/56371/22209/56438/93765/22195/22201/59008/75717/52206/56317/22186/50995/20438	33
mmu03015	mRNA surveillance pathway	25/1106	101/8870	0.000499511	0.00475292	0.00393554	83454/19047/71978/14852/67897/237082/76626/20220/230721/19045/17149/192170/60365/54451/70248/53817/13680/68219/100041953/51792/19054/73699/105083/19046/72930	25
mmu03030	DNA replication	12/1106	35/8870	0.000708343	0.00654176	0.00541674	381760/19687/19891/18972/69263/19718/17216/18538/106344/68275/69724/72151	12
mmu05132	Salmonella infection	44/1106	219/8870	0.000805423	0.0072258	0.00598315	18645/213575/73178/235661/622434/26414/11845/16649/71732/74192/67938/12028/21402/18643/11465/11461/67771/12540/56378/15516/68089/67268/67068/76709/218035/100040531/75465/53413/21414/26395/15519/22166/13067/11848/68097/100310872/13063/19349/20430/56551/71999/19353/67117/56455	44
mmu04530	Tight junction	34/1106	160/8870	0.00112636	0.00982436	0.00813482	74117/93742/224912/71978/26941/18749/83964/26414/17356/22146/67938/19684/11465/11461/22143/12540/218518/17904/67268/18747/15525/51792/109905/18260/11848/18538/13043/73699/53624/105787/108099/19353/72930/17274	34
mmu00670	One carbon pool by folate	8/1106	19/8870	0.00120936	0.0102632	0.00849823	108147/107747/22171/108037/434437/20425/108156/270685	8
mmu04914	Progesterone-mediated oocyte maturation	22/1106	90/8870	0.00126748	0.0104734	0.00867223	12534/268930/12877/69957/18749/26414/15516/268697/18747/56371/12442/26395/15519/17451/56150/18817/59008/52206/56317/14677/14679/18709	22
mmu04962	Vasopressin-regulated water reabsorption	13/1106	43/8870	0.00163206	0.0128887	0.0106722	213575/235661/18195/18749/14683/192662/19326/18747/53869/14570/11857/68097/56455	13
mmu04146	Peroxisome	21/1106	86/8870	0.00164187	0.0128887	0.0106722	22436/71382/54683/15356/18632/18477/76263/212503/20656/20280/69129/51798/15488/23986/111175/68603/113868/19299/20655/26458/170789	21
mmu03060	Protein export	10/1106	29/8870	0.0018627	0.0142656	0.0118123	66661/56529/217337/69019/66624/66286/67398/27058/20335/66212	10
mmu03410	Base excision repair	11/1106	34/8870	0.0020103	0.0150294	0.0124447	11792/11546/22256/15289/18972/11545/382913/328417/18207/18538/56626	11
mmu04140	Autophagy - animal	30/1106	141/8870	0.00210185	0.0153484	0.0127089	68441/13033/13144/19744/54673/75909/18749/66795/26414/68118/641340/97287/16783/15289/18747/207565/26395/11793/93739/12176/66922/666468/19349/18176/105787/12015/17274/66615/18709/56486	30
mmu04721	Synaptic vesicle cycle	19/1106	77/8870	0.00235745	0.0168236	0.0139304	114143/66335/18195/11974/12757/232910/66144/74325/208898/11773/11771/11966/73834/116837/108124/11973/14664/76252/13852	19
mmu00071	Fatty acid degradation	14/1106	51/8870	0.00301533	0.0210403	0.0174219	97212/110446/56752/11532/11364/231086/13177/23986/11409/11363/110695/93747/113868/15107	14
mmu01212	Fatty acid metabolism	16/1106	62/8870	0.0031285	0.0213554	0.0176828	19063/57874/97212/110446/11364/231086/20280/15488/11409/26922/11363/93747/106529/113868/14979/15107	16
mmu00270	Cysteine and methionine metabolism	14/1106	52/8870	0.0036631	0.0244726	0.0202639	11720/16832/108645/17448/236539/14630/14719/229905/17449/12035/56369/66902/67873/16833	14
mmu00900	Terpenoid backbone biosynthesis	8/1106	23/8870	0.00496951	0.0325089	0.0269182	14272/19671/110446/110196/208715/192156/68603/67422	8
mmu00010	Glycolysis / Gluconeogenesis	16/1106	66/8870	0.00606291	0.0388521	0.0321705	13382/17330/16832/18746/12183/56752/11532/13806/235339/68263/18655/18648/110695/14751/16833/14121	16
mmu04216	Ferroptosis	11/1108	40/8910	0.00789308	0.0495685	0.0408778	66734/14630/67443/14325/22059/22334/11793/27057/22335/23983/26570	11
Supplemental Table 5: KEGG pathway of gene set 4 and 5 with high expression in germ cell in nest
ID	Description	GeneRatio	BgRatio	pvalue	p.adjust	qvalue	geneID	Count
mmu03010	Ribosome	60/1000	182/8870	2.7e-15	8.27e-13	6.44e-13	94062/22121/20102/20055/76808/16785/54217/20103/56040/67186/19896/19943/19921/67097/20042/67248/27367/110954/19951/19982/269261/268449/27176/66481/27050/20085/267019/68436/19899/76846/67681/67281/78294/27207/19941/20084/67891/54127/66223/66448/11837/20054/20104/19933/66480/19946/57808/19934/20090/67115/27370/20115/20068/67427/20005/66475/50529/19989/19944/270106	60
mmu03460	Fanconi anemia pathway	17/1000	51/8870	2.37e-05	0.00337369	0.00262585	71718/233826/60534/26447/19714/223970/245000/67196/114714/18861/12144/67561/272158/52864/237911/17350/74386	17
mmu04070	Phosphatidylinositol signaling system	25/1000	96/8870	4.18e-05	0.00337369	0.00262585	18710/320634/18706/269180/18750/13139/53332/19211/104418/27399/56077/242291/18798/224020/104015/18711/18704/18720/12315/227333/18803/74302/219135/16330/170749	25
mmu04152	AMPK signaling pathway	30/1000	126/8870	4.78e-05	0.00337369	0.00262585	18710/93759/18706/12283/12443/14104/384783/59032/18639/20250/15357/107476/18607/64930/68465/23797/69008/16890/26409/19016/56717/57915/16337/68365/20787/12638/22241/235542/72149/18640	30
mmu04910	Insulin signaling pathway	32/1000	139/8870	5.49e-05	0.00337369	0.00262585	18710/18706/20663/14104/110157/384783/12402/19268/102093/208650/12929/11836/107476/18607/64930/12315/18679/54646/18576/23797/271849/16890/56717/107746/17347/18762/16337/20104/20787/20411/23921/14252	32
mmu04150	mTOR signaling pathway	34/1000	156/8870	0.000104811	0.00475553	0.00370137	18710/18706/71718/12283/29869/17168/20663/110157/18750/19211/14369/20112/57265/14370/216742/268706/18607/75705/277854/64930/13542/23797/75425/14783/69008/56717/12675/14365/16337/20104/22241/17254/72149/64899	34
mmu04012	ErbB signaling pathway	22/1000	84/8870	0.000108432	0.00475553	0.00370137	18710/18706/20663/11352/110157/12402/18750/208650/12929/11836/11839/14083/11350/13645/23797/18479/18803/271849/56717/100042150/15200/70584	22
mmu05222	Small cell lung cancer	23/1000	92/8870	0.000163881	0.00572693	0.00445744	18710/18706/12443/11798/11797/11783/19211/12447/14083/16779/12448/16399/23797/22642/107986/14268/22031/12675/16403/12827/22033/18033/12048	23
mmu05231	Choline metabolism in cancer	24/1000	98/8870	0.00016789	0.00572693	0.00445744	18710/12660/18706/20683/20663/110157/18750/13139/245880/104418/14281/56077/18590/18607/18720/64930/56517/13645/227333/23797/18803/56717/19730/74182	24
mmu04810	Regulation of actin cytoskeleton	42/1000	217/8870	0.000289309	0.00888178	0.00691296	18710/18706/232807/14182/329165/20663/110157/14184/17532/109711/20130/12929/216963/11836/16801/18590/11867/17698/14180/14083/108100/237860/18711/17898/232906/18720/56443/16399/13645/107589/50884/329251/18479/22330/14673/14268/16403/14701/12927/20544/70584/17886	42
mmu04310	Wnt signaling pathway	33/1000	162/8870	0.00049169	0.0132998	0.0103517	67772/13000/12443/77583/18750/12387/17128/21372/20319/68010/53627/18163/18798/14369/57265/16842/72293/14370/12005/18021/18099/13542/20187/19057/16348/26409/19055/26965/14365/13001/407821/73181/20317	33
mmu01522	Endocrine resistance	22/1000	93/8870	0.000519864	0.0132998	0.0103517	18710/18706/12443/20683/20663/110157/19014/104111/14281/432530/11836/14083/59035/17979/23797/11515/271849/56717/26416/13389/12580/15200	22
mmu05210	Colorectal cancer	21/1000	88/8870	0.000610265	0.0140045	0.0109001	18710/18706/12443/20663/110157/12387/14281/17128/11836/11839/12125/16842/56044/12005/13645/23797/107986/56717/19730/17350/72993	21
mmu04014	Ras signaling pathway	43/1000	232/8870	0.000642287	0.0140045	0.0109001	18710/226525/18706/14182/20663/11352/110157/22340/14184/18750/17532/19732/20130/19395/18590/56044/14180/12315/19696/217944/11350/13645/14688/72399/23797/18479/18803/271849/19344/14389/58231/12675/14701/54601/16337/56480/18033/26565/19730/12048/240057/70584/66482	43
mmu04520	Adherens junction	18/1000	71/8870	0.00068426	0.0140045	0.0109001	13000/14182/58998/19268/12387/109711/245880/21872/17128/16842/108100/18099/22330/26409/12388/13001/16337/20411	18
mmu04015	Rap1 signaling pathway	40/1000	214/8870	0.000825056	0.0158308	0.0123216	18710/75292/18706/217692/14182/238130/110157/22340/14682/14184/18750/12387/17532/104111/14681/20130/12929/19395/432530/18590/76089/18798/56044/14180/12315/217944/16399/13645/99470/23797/11515/18803/26416/107746/12388/18762/244668/16337/12927/19730	40
mmu04510	Focal adhesion	38/1000	201/8870	0.000882881	0.0159438	0.0124095	18710/18706/232807/12443/20663/110157/11798/22340/11797/18750/12387/109711/19211/12929/12824/18590/14083/16779/18607/17898/232906/18720/16399/13645/107589/21827/329251/23797/18479/22330/192176/271849/14268/107746/16403/12827/12927/70584	38
mmu05132	Salmonella infection	40/1000	219/8870	0.00130805	0.0211398	0.0164537	13424/14433/18706/170760/110157/68652/110350/11797/12387/245880/56212/20130/14281/11867/16842/56044/17281/22027/17898/18704/56443/50884/23797/18479/192176/16173/19344/26409/26416/27050/110750/12675/66724/18033/16593/353047/269338/140579/66482/80743	40
mmu05170	Human immunodeficiency virus 1 infection	43/1000	240/8870	0.00130833	0.0211398	0.0164537	18710/11765/18706/54131/110157/68652/14682/18750/14681/209091/14281/12929/14972/14964/245000/14083/18021/11920/12315/321006/14688/19057/23797/12317/18479/18803/26409/56717/26416/11767/19055/12675/108012/14701/26965/22033/56480/18033/12048/15007/70584/73181/13194	43
mmu05213	Endometrial cancer	15/1000	58/8870	0.00150508	0.0231029	0.0179817	18710/18706/12443/20663/110157/12387/19211/11836/16842/12005/18607/13645/23797/107986/17350	15
mmu05220	Chronic myeloid leukemia	18/1000	76/8870	0.00160139	0.0234108	0.0182213	18710/18706/12443/20663/110157/12402/110279/17128/12929/11836/11350/23797/107986/271849/14389/12675/18033/12048	18
mmu05135	Yersinia infection	26/1000	127/8870	0.00173507	0.0240115	0.0186889	18710/18706/54131/68652/14682/56212/14281/12929/16801/20112/14083/108100/18021/18720/68524/23797/18803/14268/16173/26409/26416/12675/56480/12927/18033/140579	26
mmu04010	MAPK signaling pathway	50/1000	294/8870	0.00179891	0.0240115	0.0186889	216965/14182/381921/26921/20663/110157/68652/22340/14184/18750/17532/330177/20130/14281/12929/19395/11836/11839/18590/76089/20112/26405/17762/14180/240672/18021/18099/30957/26940/13645/19057/23797/18479/14673/192176/73086/26409/26406/26416/26404/58231/19055/17347/12675/14701/19698/16337/20807/18033/12287	50
mmu04140	Autophagy - animal	28/1000	141/8870	0.00190398	0.024355	0.0189563	18710/18706/29869/110157/384783/17532/19211/69635/51897/20130/228361/16784/18607/64930/76559/23797/74302/26409/56717/100502698/56480/329015/12048/74244/67474/22241/77040/170749	28
mmu04392	Hippo signaling pathway - multiple species	9/1000	27/8870	0.00201739	0.0244914	0.0190624	64010/16798/319710/21676/215653/18479/18016/232157/101543	9
mmu04914	Progesterone-mediated oocyte maturation	20/1000	90/8870	0.00207419	0.0244914	0.0190624	18710/17222/18706/110157/104111/330228/209091/432530/11836/20112/70891/231207/18576/23797/11515/12530/26416/67579/69010/12235	20
mmu01521	EGFR tyrosine kinase inhibitor resistance	18/1000	79/8870	0.00254073	0.0287817	0.0224017	18710/18706/20663/110157/14184/18750/19211/11836/18590/12125/13645/23797/18803/271849/56717/20104/100042150/12048	18
mmu04218	Cellular senescence	34/1000	185/8870	0.00262504	0.0287817	0.0224017	18710/93759/18706/12443/110157/19355/15257/17532/14235/19211/209091/20130/12447/14972/14964/245000/12448/18021/11920/64930/12315/231724/19057/23797/17535/15258/12530/56717/26416/19055/72568/18033/15007/73181	34
mmu00310	Lysine degradation	15/1000	62/8870	0.00306214	0.032071	0.0249618	214162/69188/14056/26432/213389/107823/233904/208266/84505/20937/232811/235386/239122/77683/110460	15
mmu04360	Axon guidance	33/1000	180/8870	0.00313398	0.032071	0.0249618	18710/18706/110157/18750/107449/18846/20130/319757/18844/235611/22063/14270/20563/14083/237860/18021/20187/18007/11350/19057/18479/18803/13642/19055/18762/13643/14365/12168/19876/20360/70584/73181/20355	33
mmu03013	RNA transport	33/1000	181/8870	0.00343075	0.0339755	0.0264441	331401/13688/18458/74412/107939/170762/13682/68134/116940/23879/218210/75705/19704/14265/227699/54563/227720/54709/68135/70699/170930/234865/66069/445007/326622/227522/226982/67676/192160/114615/68626/66679/67204	33
mmu03015	mRNA surveillance pathway	21/1000	101/8870	0.00381343	0.0365851	0.0284753	94230/18458/74412/103677/74737/59032/68134/51786/233789/19704/228410/269061/216578/108062/226517/68188/229512/326622/432508/192160/235542	21
mmu04072	Phospholipase D signaling pathway	28/1000	149/8870	0.00435768	0.0405397	0.0315532	18710/18706/20663/110157/18750/17532/13139/104111/104418/20130/432530/56077/18590/18798/56044/18720/64930/13645/227333/23797/11515/18803/14673/271849/14389/56717/16337/19730	28
mmu04211	Longevity regulating pathway	19/1000	90/8870	0.00484589	0.0429541	0.0334324	18710/93759/18706/140742/384783/104111/51897/432530/64930/68465/23797/11515/19016/56717/77683/16337/18033/72993/22241	19
mmu04110	Cell cycle	24/1000	123/8870	0.00489704	0.0429541	0.0334324	17222/20842/12443/12577/211586/12572/19090/209091/17128/12447/245000/12448/11920/11350/12545/22642/12530/69010/12544/26965/17218/12236/12580/12235	24
mmu04068	FoxO signaling pathway	25/1000	131/8870	0.005572	0.0452854	0.035247	18710/93759/18706/12443/20663/110157/384783/19211/209091/20620/17128/11836/12125/18607/18099/11920/13645/23797/12452/26416/58231/26556/12675/54601/16337	25
mmu00562	Inositol phosphate metabolism	16/1000	72/8870	0.00557366	0.0452854	0.035247	320634/18706/269180/53332/19211/18798/224020/104015/18711/18704/18720/18803/74302/219135/16330/170749	16
mmu04120	Ubiquitin mediated proteolysis	27/1000	145/8870	0.0057454	0.0452854	0.035247	235439/17222/26554/16396/11798/11797/12402/208650/17318/231380/15204/107986/67345/268470/217342/66313/140630/78294/231672/69010/26965/56469/66894/230904/74126/140629/13194	27
mmu04137	Mitophagy - animal	15/1000	66/8870	0.00575287	0.0452854	0.035247	13000/20683/17532/20130/228361/17966/66437/78294/13001/94044/56480/12048/66169/67414/22241	15
