# Supplementary material for: Single-cell transcriptome landscape of ovarian cells during primordial follicle assembly in mice
Source: PLoS Biol. 2020 Dec 22;18(12):e3001025. doi: 10.1371/journal.pbio.3001025 (PMC7787681; doi:10.1371/journal.pbio.3001025)
Supplement: S6 Table — (XLSX) [file pbio.3001025.s013.xlsx]

## Sheet: S6_Table
Supplemental Table 6: Top 50 marker genes of granulosa cell clusters
ID	p_val	avg_logFC	pct.1	pct.2	p_val_adj	cluster	gene
1	0	0.980023	0.948	0.679	0	1	Creg1
2	0	0.97841	0.861	0.442	0	1	Aldh1b1
3	0	0.965525	0.976	0.867	0	1	Arl6ip1
4	0	0.790602	1	0.998	0	1	Prdx1
5	1.8783e-262	0.779817	0.974	0.746	3.9326e-258	1	Gstm6
6	1.80473e-251	0.883407	0.936	0.718	3.77856e-247	1	Aldh1a1
7	3.27845e-246	0.621948	0.989	0.954	6.8641e-242	1	Vdac3
8	3.18156e-243	0.755839	0.948	0.817	6.66124e-239	1	Aldh2
9	1.46666e-236	0.816434	0.96	0.72	3.07074e-232	1	Gatm
10	1.66969e-208	0.881052	0.655	0.292	3.49583e-204	1	Tgfbr3l
11	3.33285e-197	0.625225	0.425	0.086	6.978e-193	1	Wfdc6a
12	9.74416e-190	0.522152	0.99	0.966	2.04013e-185	1	Akr1a1
13	3.77801e-188	0.779577	0.908	0.657	7.91001e-184	1	Bst2
14	1.50563e-186	0.765587	0.88	0.662	3.15234e-182	1	Fxyd6
15	2.45862e-184	0.59897	0.95	0.829	5.14761e-180	1	Idh1
16	1.33141e-182	0.536999	0.98	0.89	2.78757e-178	1	Psap
17	2.46616e-182	0.524769	0.974	0.863	5.1634e-178	1	Serinc3
18	4.95505e-181	0.527842	0.997	0.969	1.03744e-176	1	Gstm2
19	8.34086e-173	0.56527	0.921	0.785	1.74633e-168	1	Polr2g
20	2.37231e-172	0.523814	0.997	0.919	4.9669e-168	1	Maged2
21	1.92108e-167	0.66054	0.457	0.133	4.02217e-163	1	U90926
22	1.66468e-158	0.567804	0.923	0.66	3.48535e-154	1	Cdkn1b
23	2.69021e-157	0.499211	0.978	0.864	5.63249e-153	1	Acaa2
24	1.78253e-156	0.48739	0.947	0.862	3.73208e-152	1	mt-Nd5
25	3.11219e-152	0.530553	0.918	0.741	6.51599e-148	1	Atp1b1
26	2.17975e-149	0.534086	0.842	0.584	4.56374e-145	1	Fbxo21
27	8.33707e-146	0.519495	0.947	0.828	1.74553e-141	1	Itm2c
28	2.44634e-145	0.567914	0.89	0.654	5.12191e-141	1	Irx3
29	4.04778e-133	0.535188	0.966	0.883	8.47484e-129	1	Serpinb6a
30	3.19504e-129	0.510463	0.844	0.643	6.68945e-125	1	Oat
31	1.16601e-128	0.569266	0.826	0.542	2.44127e-124	1	Gm14226
32	7.17922e-123	0.460774	0.902	0.734	1.50311e-118	1	Usp9x
33	2.06738e-120	0.47868	0.33	0.084	4.32847e-116	1	Gsta3
34	6.1756e-119	0.481212	0.924	0.835	1.29299e-114	1	Oaz2
35	4.12203e-112	0.489214	0.607	0.339	8.6303e-108	1	Tspan18
36	1.36216e-105	0.469477	0.611	0.341	2.85196e-101	1	Armcx5
37	1.41776e-104	0.521002	0.697	0.448	2.96837e-100	1	Hs6st2
38	4.50888e-104	0.551466	0.613	0.36	9.44023e-100	1	Tmem184a
39	3.91914e-102	0.666798	0.647	0.428	8.2055e-98	1	Folr1
40	1.56058e-101	0.557256	0.468	0.214	3.26738e-97	1	Cox7a1
41	3.17726e-100	0.46542	0.77	0.566	6.65222e-96	1	Klhl23
42	1.96547e-99	0.655014	0.433	0.185	4.11511e-95	1	Rhox8
43	1.75391e-93	0.474277	0.674	0.455	3.67217e-89	1	Col4a1
44	1.6358e-88	0.479943	0.788	0.614	3.42487e-84	1	Ly6e
45	2.79938e-73	0.460198	0.814	0.667	5.86107e-69	1	Hes1
46	3.21569e-72	0.575685	0.689	0.514	6.7327e-68	1	Mgp
47	4.35267e-59	0.922366	0.591	0.446	9.11319e-55	1	Cst12
48	6.64777e-55	0.696222	0.477	0.289	1.39184e-50	1	Hmox1
49	1.2456e-42	0.52013	0.51	0.342	2.60792e-38	1	Crygb
50	1.41312e-41	0.490643	0.594	0.449	2.95865e-37	1	Cst8
51	0	2.20589	0.916	0.128	0	2	Serpine2
52	0	1.81792	0.924	0.458	0	2	Akr1cl
53	0	1.54321	0.871	0.253	0	2	Akr1c14
54	0	1.51833	0.932	0.341	0	2	St3gal5
55	0	1.39888	0.659	0.157	0	2	Hsd3b1
56	0	1.27992	0.977	0.684	0	2	Ctsl
57	0	1.23765	0.833	0.169	0	2	Thbs1
58	0	1.20145	0.927	0.556	0	2	Rgs2
59	0	1.19825	0.727	0.095	0	2	Metrnl
60	0	1.1483	0.984	0.547	0	2	Mfap2
61	0	1.14594	0.999	0.93	0	2	Tceal9
62	0	1.1303	0.766	0.175	0	2	Ephx2
63	0	1.00397	0.926	0.485	0	2	Col18a1
64	0	0.9309	0.755	0.183	0	2	Tenm4
65	0	0.894279	0.644	0.099	0	2	Arhgap31
66	0	0.884917	1	0.997	0	2	Tsc22d1
67	0	0.830713	0.474	0.008	0	2	Slc18a2
68	0	0.804909	0.575	0.073	0	2	Dpysl3
69	0	0.796343	0.688	0.128	0	2	Tril
70	2.23003e-305	0.81706	0.649	0.131	4.66901e-301	2	Cfh
71	2.51727e-301	0.892546	0.999	0.938	5.27042e-297	2	Gstm1
72	5.68196e-298	0.815439	0.377	0.019	1.18963e-293	2	Col8a1
73	6.4037e-296	0.873064	0.877	0.417	1.34074e-291	2	Gpc4
74	1.99432e-293	0.850222	0.953	0.624	4.1755e-289	2	Ivns1abp
75	1.19224e-284	0.865717	0.951	0.63	2.4962e-280	2	Bex3
76	4.62993e-281	1.03227	0.925	0.548	9.69368e-277	2	Aard
77	7.06449e-281	0.76688	0.953	0.631	1.47909e-276	2	Tgfb1i1
78	3.633e-278	0.919727	0.915	0.5	7.60642e-274	2	Slc40a1
79	1.32515e-275	1.10056	0.967	0.658	2.77447e-271	2	Hmgcs2
80	6.88917e-275	1.25679	0.978	0.745	1.44239e-270	2	Clu
81	1.33721e-273	1.20487	0.898	0.516	2.79971e-269	2	Inha
82	4.55336e-270	0.943204	0.881	0.478	9.53338e-266	2	Map1b
83	1.35502e-267	0.820822	0.969	0.534	2.837e-263	2	Foxl2
84	1.81322e-267	0.735585	0.993	0.807	3.79634e-263	2	Cpe
85	3.4574e-266	0.801718	0.674	0.187	7.23876e-262	2	Serpinf1
86	1.36061e-255	0.757616	0.993	0.958	2.84871e-251	2	Ccnd2
87	1.92231e-254	0.926135	0.997	0.926	4.02474e-250	2	Maged2
88	2.75197e-244	0.752335	0.599	0.141	5.7618e-240	2	Phlda1
89	9.58783e-241	0.743278	0.878	0.499	2.0074e-236	2	Gtf2e2
90	4.77726e-234	0.856002	0.891	0.543	1.00022e-229	2	Socs2
91	3.9273e-233	0.737577	0.992	0.927	8.22258e-229	2	Gas6
92	6.79436e-233	0.933013	0.917	0.596	1.42253e-228	2	Arxes2
93	3.06213e-226	0.828873	0.539	0.119	6.41118e-222	2	Ramp1
94	4.46993e-217	0.924299	0.91	0.561	9.35869e-213	2	Tuba1a
95	3.80172e-207	0.82706	0.708	0.298	7.95967e-203	2	Htra1
96	2.60956e-172	0.734282	0.632	0.239	5.46363e-168	2	Kazald1
97	1.31138e-168	0.717895	0.983	0.735	2.74564e-164	2	Gatm
98	1.76041e-159	0.790827	0.979	0.887	3.68577e-155	2	Serpinb6a
99	2.90323e-145	0.784927	0.547	0.193	6.0785e-141	2	Tnni3
100	1.78563e-73	0.746335	0.499	0.242	3.73858e-69	2	Wfdc10
101	0	2.12207	0.977	0.266	0	3	Krt19
102	0	1.86585	0.956	0.173	0	3	Upk3b
103	0	1.57086	0.997	0.603	0	3	Krt18
104	0	1.47293	0.957	0.405	0	3	Mt2
105	0	1.39646	0.994	0.7	0	3	Mt1
106	0	1.32376	0.986	0.551	0	3	Krt8
107	0	1.24714	0.956	0.538	0	3	Igfbp5
108	0	1.21427	0.971	0.601	0	3	Igfbp2
109	0	1.21133	0.921	0.27	0	3	Epcam
110	0	1.19661	0.869	0.182	0	3	Krt7
111	0	1.18954	0.787	0.08	0	3	Upk1b
112	0	1.13786	0.68	0.066	0	3	Lgals2
113	0	1.10262	0.847	0.124	0	3	Tm4sf5
114	0	1.06437	0.852	0.227	0	3	Eln
115	0	1.04175	0.719	0.178	0	3	Dcn
116	0	1.03373	1	0.935	0	3	Lgals7
117	0	0.941328	0.835	0.23	0	3	Cav1
118	0	0.92635	0.993	0.754	0	3	Cald1
119	0	0.914162	0.91	0.355	0	3	Bcam
120	0	0.90845	0.781	0.103	0	3	Tmem151a
121	0	0.783267	0.619	0.051	0	3	Tspan8
122	0	0.757193	0.74	0.177	0	3	Ildr2
123	0	0.74683	0.556	0.037	0	3	Gpm6a
124	0	0.728764	0.7	0.117	0	3	Loxl2
125	4.40879e-307	0.859209	0.944	0.46	9.23068e-303	3	Lsr
126	1.75565e-298	1.0136	0.999	0.925	3.6758e-294	3	Lgals1
127	1.93047e-295	0.780503	0.798	0.243	4.04182e-291	3	Plat
128	7.83385e-293	0.915242	0.968	0.553	1.64017e-288	3	Hspb1
129	4.77079e-278	1.0201	0.975	0.643	9.9886e-274	3	Apoe
130	2.37563e-271	0.727605	0.691	0.172	4.97385e-267	3	Anxa1
131	5.16935e-267	0.924611	0.793	0.291	1.08231e-262	3	Gm20186
132	4.13717e-265	0.804166	0.868	0.385	8.66199e-261	3	Palld
133	1.10441e-259	0.750357	0.898	0.36	2.31231e-255	3	Gpc3
134	2.15352e-259	1.08627	0.639	0.154	4.50883e-255	3	Crip1
135	1.00298e-257	0.766735	0.794	0.283	2.09994e-253	3	Lmna
136	1.93357e-256	0.688336	0.672	0.174	4.04832e-252	3	Slc9a3r1
137	3.61454e-254	0.91816	0.595	0.13	7.56777e-250	3	Fabp5
138	6.80097e-250	0.818841	0.947	0.507	1.42392e-245	3	Tnni1
139	5.89132e-249	0.722181	0.745	0.221	1.23347e-244	3	Egfl6
140	6.89371e-245	0.801028	0.971	0.778	1.44334e-240	3	Soat1
141	1.64865e-236	0.756214	0.933	0.529	3.45178e-232	3	Anxa5
142	2.05539e-233	0.719641	0.881	0.44	4.30337e-229	3	Dctn6
143	9.72426e-228	0.698536	0.524	0.103	2.03597e-223	3	Ooep
144	1.46281e-227	0.837056	0.986	0.648	3.06269e-223	3	Gng13
145	2.7683e-224	0.806008	0.831	0.353	5.79598e-220	3	Fabp3
146	5.33469e-222	0.710135	0.765	0.274	1.11692e-217	3	Col6a2
147	2.29823e-205	0.736657	0.853	0.416	4.81179e-201	3	Ezr
148	1.54642e-202	0.687214	0.887	0.448	3.23773e-198	3	Lhx9
149	8.70399e-196	0.679187	0.842	0.411	1.82235e-191	3	Gsn
150	8.67741e-158	0.692347	0.76	0.355	1.81679e-153	3	Prss35
151	0	1.648	0.942	0.653	0	4	Hbb-bt
152	0	1.58867	0.994	0.965	0	4	Hbb-bs
153	0	1.47065	0.984	0.879	0	4	Hba-a1
154	1.86533e-293	0.847718	0.977	0.99	3.90544e-289	4	Xist
155	1.54192e-291	1.51494	0.947	0.709	3.22833e-287	4	Hba-a2
156	2.78628e-239	0.515192	1	1	5.83363e-235	4	Rpl23a
157	3.1416e-220	0.504986	1	1	6.57756e-216	4	Rps11
158	2.49164e-212	0.793379	0.986	0.832	5.21674e-208	4	H19
159	9.77555e-201	0.411309	1	1	2.04671e-196	4	Rpl41
160	2.36571e-196	0.375815	1	1	4.95308e-192	4	Rpl37a
161	7.60623e-188	0.797278	0.704	0.327	1.59252e-183	4	Wnt4
162	1.00556e-179	0.368794	1	0.999	2.10535e-175	4	Rpl35a
163	1.85263e-174	0.370971	0.999	1	3.87884e-170	4	Fau
164	5.19397e-174	0.371977	1	0.999	1.08746e-169	4	Rps27a
165	5.11191e-170	0.384711	1	1	1.07028e-165	4	Rpl37
166	5.92534e-169	0.838969	0.849	0.546	1.24059e-164	4	Id3
167	5.47674e-167	0.386668	1	1	1.14666e-162	4	Rpl27a
168	6.07231e-163	0.605956	0.995	0.939	1.27136e-158	4	Kctd14
169	5.1728e-162	0.370989	0.999	0.999	1.08303e-157	4	Rpl31
170	2.12723e-156	0.373072	0.999	0.998	4.45378e-152	4	Rpl29
171	5.10564e-155	0.684216	0.95	0.777	1.06897e-150	4	Ifitm1
172	1.81192e-152	0.375649	0.998	0.999	3.79362e-148	4	Rpl28
173	1.79795e-151	0.370084	0.998	1	3.76436e-147	4	Rps15
174	7.27016e-146	0.671594	0.942	0.628	1.52215e-141	4	Cdkn1c
175	1.55165e-128	0.387023	1	0.998	3.24869e-124	4	Rps28
176	1.38329e-127	0.419444	0.99	0.975	2.8962e-123	4	Tma7
177	2.08213e-118	0.532814	0.818	0.589	4.35936e-114	4	Nfat5
178	1.70755e-96	0.666385	0.826	0.647	3.57511e-92	4	Fst
179	3.38569e-92	0.498898	0.394	0.134	7.08862e-88	4	Msx1
180	5.62455e-91	0.646417	0.564	0.292	1.17761e-86	4	Rmst
181	2.0195e-85	0.415629	0.414	0.168	4.22823e-81	4	Pbx3
182	1.52953e-82	0.569866	0.776	0.553	3.20238e-78	4	Egr1
183	1.11622e-77	0.455019	0.557	0.301	2.33703e-73	4	Lbx2
184	1.1746e-74	0.412325	0.88	0.754	2.45926e-70	4	Tcf12
185	4.33368e-73	0.43212	0.732	0.463	9.07343e-69	4	Fndc5
186	3.38839e-72	0.484736	0.632	0.385	7.09428e-68	4	Id2
187	1.47791e-70	0.408617	0.49	0.241	3.09431e-66	4	Pla2g1b
188	1.08311e-66	0.429897	0.696	0.496	2.26771e-62	4	Igfbp4
189	1.53423e-66	0.475586	0.611	0.376	3.21222e-62	4	Gm2044
190	2.56982e-66	0.51975	0.814	0.665	5.38044e-62	4	Ier2
191	9.63275e-61	0.394764	0.616	0.42	2.01681e-56	4	Zfp503
192	2.60661e-58	0.388002	0.393	0.192	5.45747e-54	4	Maf
193	3.90519e-58	0.421477	0.578	0.337	8.17629e-54	4	Junb
194	1.84603e-55	0.370177	0.434	0.231	3.86503e-51	4	Klhl5
195	1.31645e-53	0.417579	0.386	0.183	2.75625e-49	4	Ptn
196	3.36551e-52	0.371503	0.538	0.362	7.04637e-48	4	Ints6
197	2.57933e-50	0.376048	0.481	0.296	5.40035e-46	4	Pdlim4
198	5.18408e-49	0.433241	0.686	0.548	1.08539e-44	4	Lgr4
199	1.73538e-40	0.379097	0.624	0.498	3.63336e-36	4	Micu1
200	1.11868e-36	0.425155	0.495	0.328	2.34219e-32	4	Bhlhe41
201	5.78595e-259	0.87772	1	1	1.2114e-254	5	Rpl41
202	2.25445e-248	0.799177	1	0.999	4.72014e-244	5	Rpl32
203	3.53654e-248	0.796722	1	1	7.40445e-244	5	Rps5
204	1.46018e-243	0.792805	1	1	3.05718e-239	5	Rplp0
205	1.20307e-241	0.689898	1	1	2.51887e-237	5	Rpl13
206	1.87275e-241	0.790976	1	1	3.92097e-237	5	Rpl18a
207	6.73989e-239	0.710168	1	1	1.41113e-234	5	Rps19
208	2.13868e-237	0.700216	1	1	4.47775e-233	5	Rps8
209	7.89591e-237	0.780337	1	0.999	1.65317e-232	5	Rps26
210	8.57056e-234	0.729197	1	0.999	1.79442e-229	5	Rplp1
211	2.86541e-233	0.691262	1	0.999	5.99932e-229	5	Rps7
212	2.14683e-232	0.838728	1	0.995	4.49483e-228	5	Rps12
213	3.78191e-230	0.693273	1	0.999	7.91819e-226	5	Rps27a
214	5.70815e-228	0.688764	1	0.999	1.19511e-223	5	Rps29
215	8.34198e-224	0.721551	1	0.999	1.74656e-219	5	Rps20
216	1.36367e-223	0.747504	1	0.999	2.85513e-219	5	Rpl28
217	2.5155e-223	0.661454	1	1	5.26671e-219	5	Rps18
218	2.9526e-223	0.728887	1	0.996	6.18186e-219	5	Rpsa
219	3.0274e-223	0.66876	1	1	6.33846e-219	5	Rps4x
220	1.49386e-220	0.658641	1	0.999	3.1277e-216	5	Rps17
221	1.63315e-219	0.672376	1	0.999	3.41933e-215	5	Rps15
222	2.77707e-219	0.668961	1	0.999	5.81436e-215	5	Rplp2
223	5.79099e-219	0.806412	1	0.999	1.21246e-214	5	Rps28
224	5.88756e-218	0.728347	1	0.998	1.23268e-213	5	Rpl36a
225	5.76684e-217	0.621194	1	1	1.2074e-212	5	Rps3a1
226	4.37978e-216	0.675339	1	1	9.16995e-212	5	Rpl37
227	1.66372e-214	0.645861	1	1	3.48333e-210	5	Rpl23
228	7.78387e-211	0.709312	1	0.999	1.62971e-206	5	Rpl10a
229	1.45542e-210	0.684149	1	0.999	3.04721e-206	5	Rps10
230	4.61375e-209	0.638293	1	0.999	9.65981e-205	5	Rpl36
231	1.90141e-207	0.653391	1	0.998	3.98098e-203	5	Rpl29
232	2.5212e-205	0.617671	1	0.999	5.27865e-201	5	Rpl35a
233	1.11261e-202	0.641955	1	0.999	2.32946e-198	5	Rpl31
234	8.90994e-197	0.624184	1	1	1.86548e-192	5	Rpl27a
235	3.07373e-191	0.699192	1	0.99	6.43548e-187	5	Rpl12
236	1.31218e-175	1.28206	0.996	0.681	2.74731e-171	5	Hbb-bt
237	6.49656e-163	1.07585	1	0.967	1.36018e-158	5	Hbb-bs
238	1.48596e-161	1.19476	1	0.889	3.11116e-157	5	Hba-a1
239	1.88629e-159	0.620119	0.998	0.989	3.94933e-155	5	Rpl7a
240	1.24868e-158	0.62901	1	0.979	2.61437e-154	5	Rack1
241	1.28705e-149	1.08469	0.994	0.731	2.69469e-145	5	Hba-a2
242	2.74962e-140	0.797286	0.654	0.196	5.75688e-136	5	Dlk1
243	1.55723e-115	0.87664	0.449	0.096	3.26038e-111	5	Pclaf
244	4.72881e-103	0.739935	0.996	0.659	9.90072e-99	5	Cdkn1c
245	3.03962e-99	0.776125	0.505	0.143	6.36406e-95	5	Cyr61
246	1.0084e-83	0.745645	0.975	0.737	2.11129e-79	5	Mt1
247	1.75769e-73	0.669366	0.389	0.109	3.68009e-69	5	Cenpa
248	4.82084e-68	0.67161	0.855	0.481	1.00934e-63	5	Mt2
249	2.17864e-65	0.74735	0.894	0.616	4.56141e-61	5	Mdk
250	7.90621e-39	0.69749	0.758	0.567	1.65532e-34	5	Hmgb2
251	0	1.1722	0.921	0.038	0	6	Mki67
252	0	1.14698	0.912	0.044	0	6	Racgap1
253	3.34057e-297	1.1842	0.921	0.052	6.99416e-293	6	Tpx2
254	2.67871e-296	1.13668	0.921	0.052	5.60843e-292	6	Ccna2
255	9.23478e-294	0.951879	0.798	0.036	1.93349e-289	6	Pbk
256	1.63979e-258	1.09287	0.868	0.052	3.43322e-254	6	Ccnb1
257	9.52069e-245	0.965908	0.798	0.046	1.99335e-240	6	Knstrn
258	4.79046e-227	1.29074	0.868	0.065	1.00298e-222	6	Prc1
259	6.73698e-225	1.30792	0.93	0.078	1.41052e-220	6	Cdca3
260	1.59873e-221	1.70121	0.947	0.083	3.34727e-217	6	Cenpf
261	2.16403e-212	1.22206	0.868	0.069	4.53084e-208	6	Tk1
262	1.35824e-208	1.18824	0.789	0.057	2.84374e-204	6	Nusap1
263	3.19687e-198	1.71969	0.895	0.085	6.69328e-194	6	Top2a
264	5.71303e-189	1.57811	0.851	0.079	1.19614e-184	6	Cdc20
265	3.46861e-172	1.68703	0.939	0.11	7.26222e-168	6	Pclaf
266	7.13198e-172	1.15605	0.93	0.108	1.49322e-167	6	Cdca8
267	3.46717e-157	1.22051	0.868	0.098	7.25921e-153	6	Ccnb2
268	2.00787e-148	0.971427	0.904	0.113	4.20388e-144	6	Spc24
269	2.18485e-133	1.52453	0.86	0.118	4.57442e-129	6	Cenpa
270	8.79699e-127	1.30669	0.912	0.149	1.84182e-122	6	Cdk1
271	4.46706e-120	1.63816	0.965	0.208	9.35268e-116	6	Birc5
272	1.29256e-109	0.998417	0.895	0.158	2.70624e-105	6	Tagln2
273	9.7245e-108	1.09598	0.711	0.091	2.03602e-103	6	Rrm2
274	2.08412e-103	1.12972	0.974	0.226	4.36353e-99	6	Smc2
275	1.1679e-93	1.11362	0.693	0.107	2.44523e-89	6	Hist1h1b
276	7.84461e-90	1.05618	0.939	0.232	1.64243e-85	6	Smc4
277	4.40846e-87	1.40486	0.886	0.198	9.22999e-83	6	Ube2c
278	1.27032e-77	1.35331	0.816	0.188	2.65967e-73	6	Hist1h2ae
279	3.95526e-77	1.9603	1	0.576	8.28112e-73	6	Hmgb2
280	6.34042e-72	1.40909	0.991	0.474	1.32749e-67	6	H2afx
281	4.93813e-71	0.98824	0.965	0.321	1.0339e-66	6	Lmnb1
282	7.79831e-71	1.5548	1	0.947	1.63273e-66	6	H2afz
283	2.89112e-70	2.23732	0.825	0.222	6.05313e-66	6	Hist1h2ap
284	1.42455e-69	1.36774	0.991	0.437	2.98257e-65	6	Cks2
285	6.28627e-67	1.03726	0.921	0.293	1.31616e-62	6	Lockd
286	2.67444e-66	1.50615	1	0.863	5.59947e-62	6	Stmn1
287	1.46484e-64	1.00419	0.746	0.176	3.06694e-60	6	Hist1h1e
288	3.58145e-64	1.36978	1	0.94	7.49848e-60	6	Tuba1b
289	2.39406e-62	1.14113	1	0.939	5.01243e-58	6	Hmgn2
290	4.54692e-62	1.0345	0.982	0.469	9.51988e-58	6	Tmpo
291	9.45341e-59	1.06356	0.947	0.338	1.97926e-54	6	Eln
292	8.41116e-58	1.05467	0.886	0.298	1.76104e-53	6	Tuba1c
293	2.12448e-57	1.08281	0.965	0.314	4.44802e-53	6	Upk3b
294	1.08159e-56	0.981838	1	0.917	2.26452e-52	6	H2afv
295	1.10461e-56	1.15371	0.833	0.238	2.31273e-52	6	Crip1
296	2.32691e-54	1.4308	0.991	0.5	4.87185e-50	6	Tubb4b
297	2.47775e-51	1.13276	0.991	0.394	5.18767e-47	6	Krt19
298	5.17188e-50	1.02758	1	0.979	1.08284e-45	6	Tubb5
299	1.24254e-41	1.0005	0.982	0.63	2.6015e-37	6	Krt8
300	5.41785e-38	0.965627	0.974	0.73	1.13434e-33	6	H1f0
